# Supplementary material for: Design of highly efficient g-C3N4-based metal monoatom catalysts by two extra-NM1 atoms: density functional theory simulations
Source: Royal Society of Chemistry journal article supplement (doi:10.1039/d1cp00972a), 2021-01-01
Supplement: d1cp00972a1.pdf [file d1cp00972a1.pdf]

Supporting Information For

**Design of high-efficiency g-C<sub>3</sub>N<sub>4</sub> based metal monoatom catalysts by  
two extra-NM<sub>1</sub> atoms: density functional theory simulations**

Miaogen Chen<sup>a\*</sup>, Wenya Chang<sup>a</sup>, Yaxin Shi<sup>a</sup>, Wei Liu<sup>b</sup>, Can Li<sup>a\*</sup>

<sup>a</sup> Department of Physics, Institute of Optoelectronic Materials and Devices, China Jiliang  
University, Hangzhou, 310018, P. R. China

<sup>b</sup> College of Materials Science and Engineering, Nanjing University of Science and  
Technology, Nanjing 210011, P. R. China

\*Corresponding author, E-mail: phycmg@cjlu.edu.cn, canli1983@gmail.com

## 1 Computational details

The adsorption energies of OH, O and OOH groups on the substrates by following:

$$\Delta E^*_{\text{O}} = E(\text{sub/O}) - E(\text{sub}) - [E(\text{H}_2\text{O}) - E(\text{H}_2)] \quad (\text{S1})$$

$$\Delta E^*_{\text{OH}} = E(\text{sub/OH}) - E(\text{sub}) - [E(\text{H}_2\text{O}) - E(\text{H}_2)/2] \quad (\text{S2})$$

$$\Delta E^*_{\text{OOH}} = E(\text{sub/OOH}) - E(\text{sub}) - [2 \times E(\text{H}_2\text{O}) - 3 \times E(\text{H}_2)/2] \quad (\text{S3})$$

where  $E(\text{sub/H}_2\text{O})$ ,  $E(\text{sub/OH})$ ,  $E(\text{sub/O})$  and  $E(\text{sub/OOH})$  denote the total energies of H<sub>2</sub>O, OH, O and OOH groups on the substrates.  $E(\text{sub})$ ,  $E(\text{H}_2\text{O})$  and  $E(\text{H}_2)$  are the energies of bare substrate, water, and hydrogen gas, respectively.

The detailed Gibbs free energy change can be calculated by:

$$\Delta G_1 = \Delta G^*_{\text{OH}} - eU \quad (\text{S4})$$

$$\Delta G_2 = \Delta G^*_{\text{O}} - \Delta G^*_{\text{OH}} - eU \quad (\text{S5})$$

$$\Delta G_3 = \Delta G^*_{\text{OOH}} - \Delta G^*_{\text{O}} - eU \quad (\text{S6})$$

$$\Delta G_4 = 4.92 \text{ eV} - \Delta G^*_{\text{OOH}} - eU \quad (\text{S7})$$

where the sum of  $\Delta G_{1-4}$  is fixed to the negative of experimental Gibbs free energy of formation of two water molecules ( $-2 \Delta_{\text{H}_2\text{O}}^{\text{exp}} = 4.92 \text{ eV}$ ). The Gibbs free energy of ( $\text{H}^+ + \text{e}^-$ ) in solution is estimated as the half energy of H<sub>2</sub> molecule at standard condition.

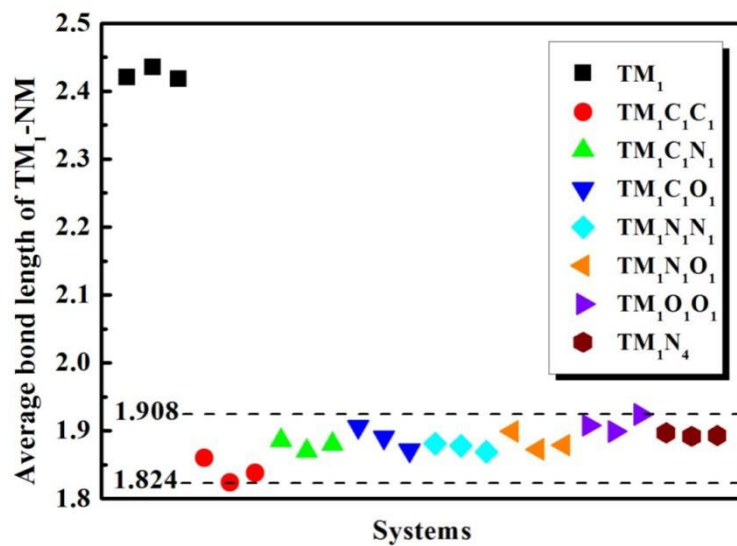

**Fig. S1** Average lengths of TM<sub>1</sub>-NM<sub>1</sub> bonds in all considered systems with unit of Å.

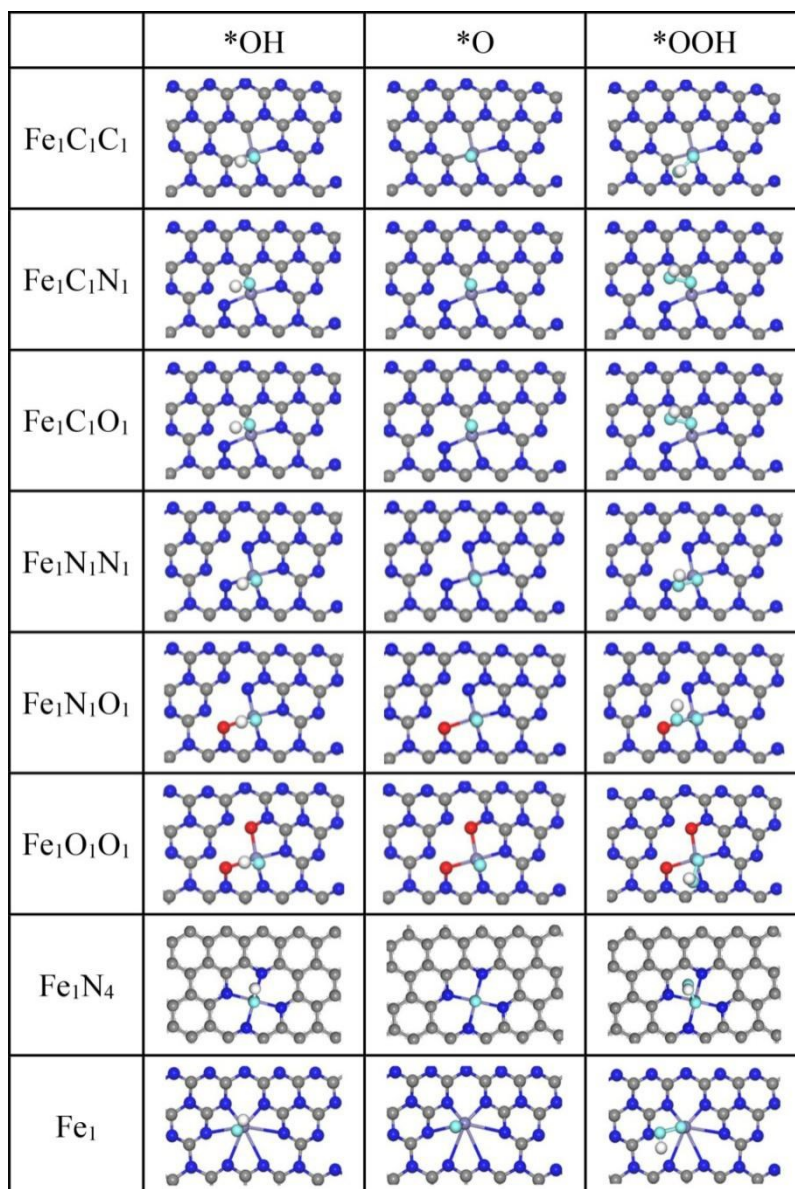

**Fig. S2** Partial atom structures of \*OH, \*O and \*OOH at active sites of Fe<sub>1</sub> based systems.

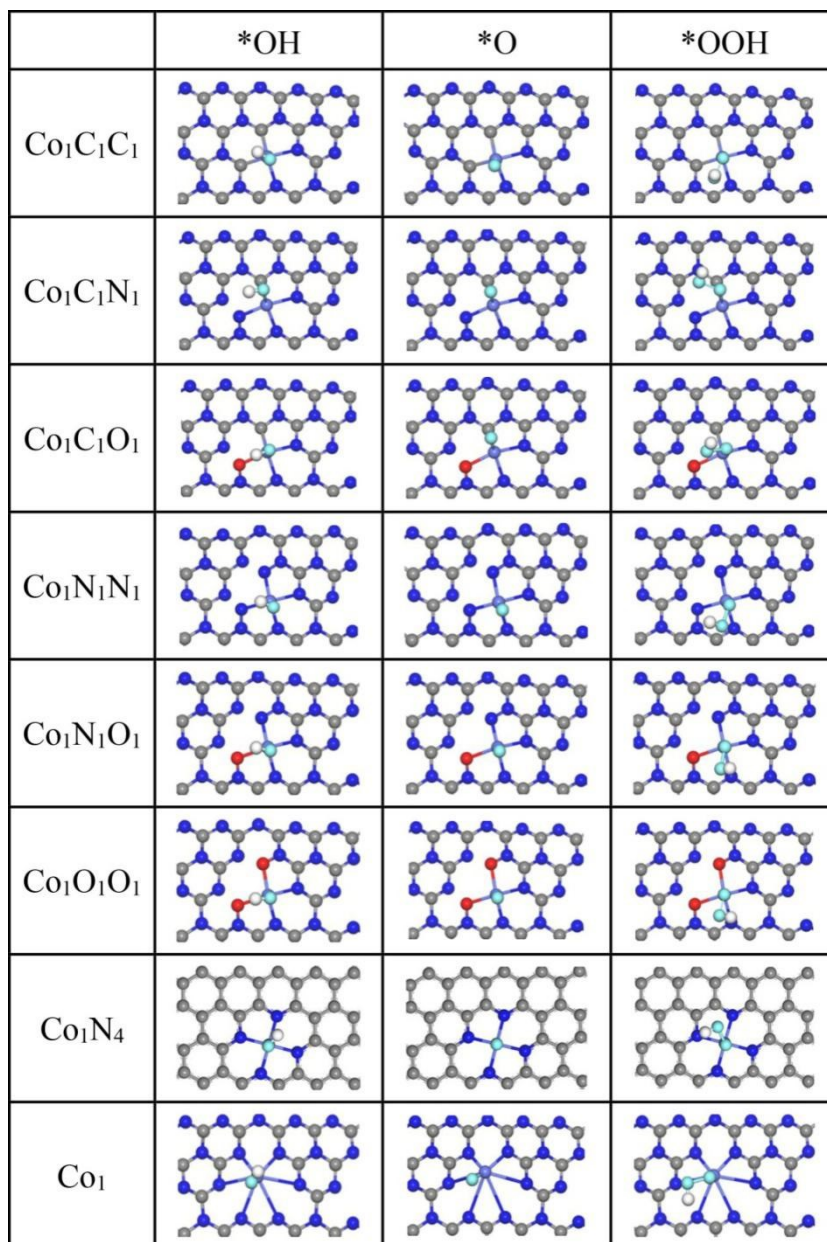

**Fig. S3** Partial atom structures of \*OH, \*O and \*OOH at active sites of Co<sub>1</sub> based systems.

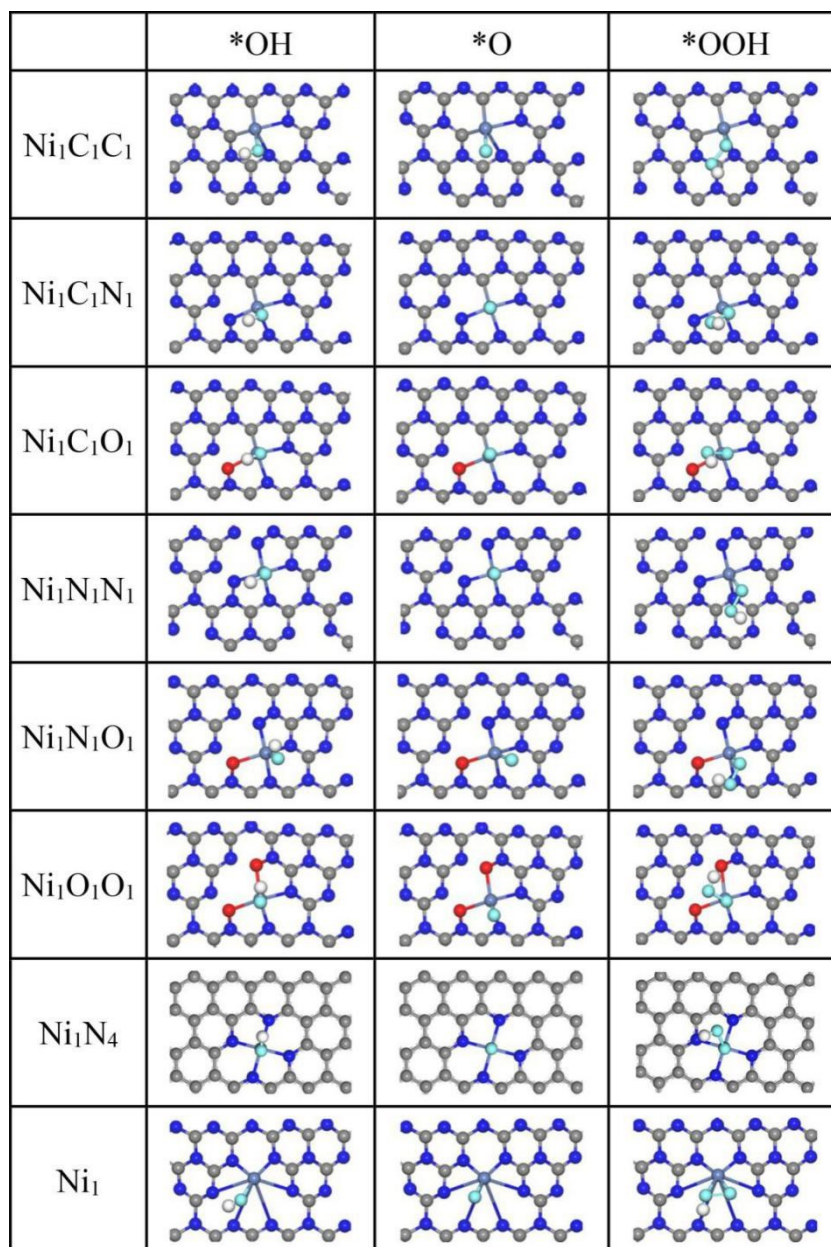

**Fig. S4** Partial atom structures of \*OH, \*O and \*OOH at active sites of Ni<sub>1</sub> based systems.

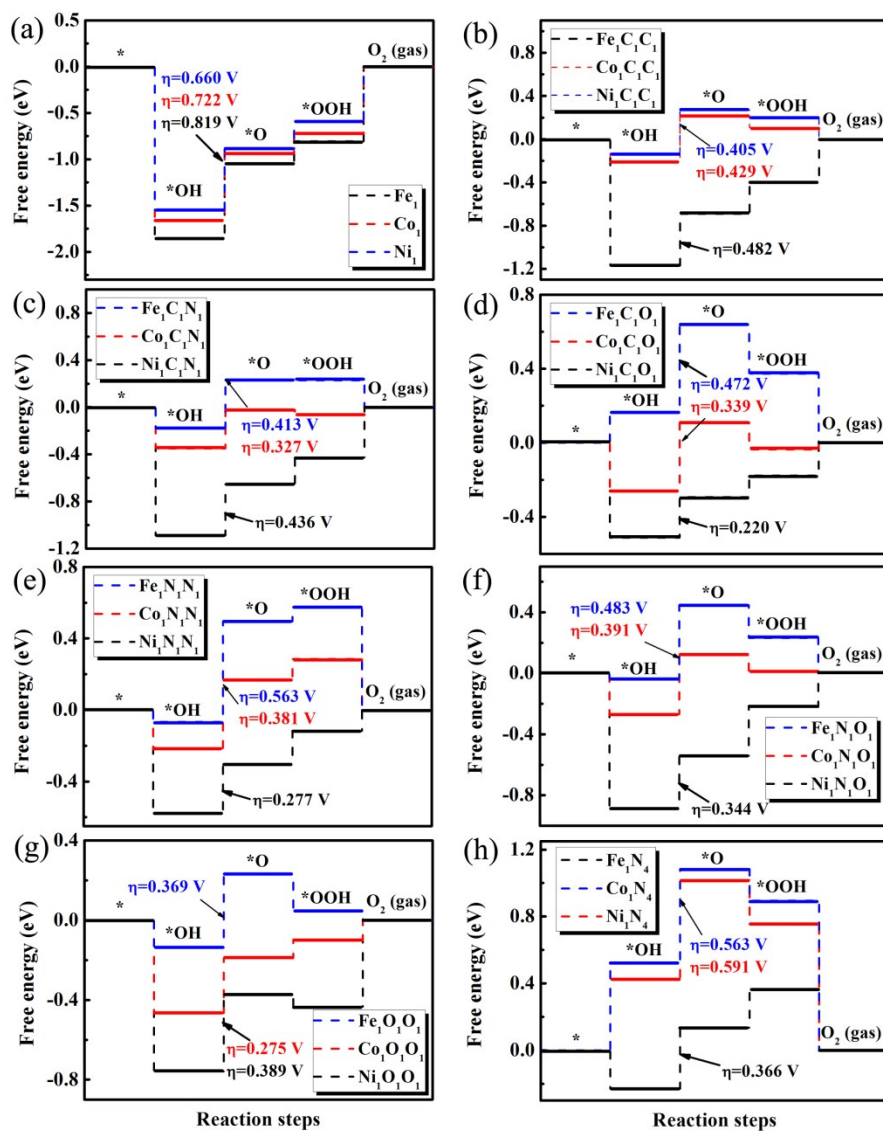

**Fig. S5** Gibbs free energy change curves of all systems with potential  $U = 1.23$  V vs RHE and without solvation effect.

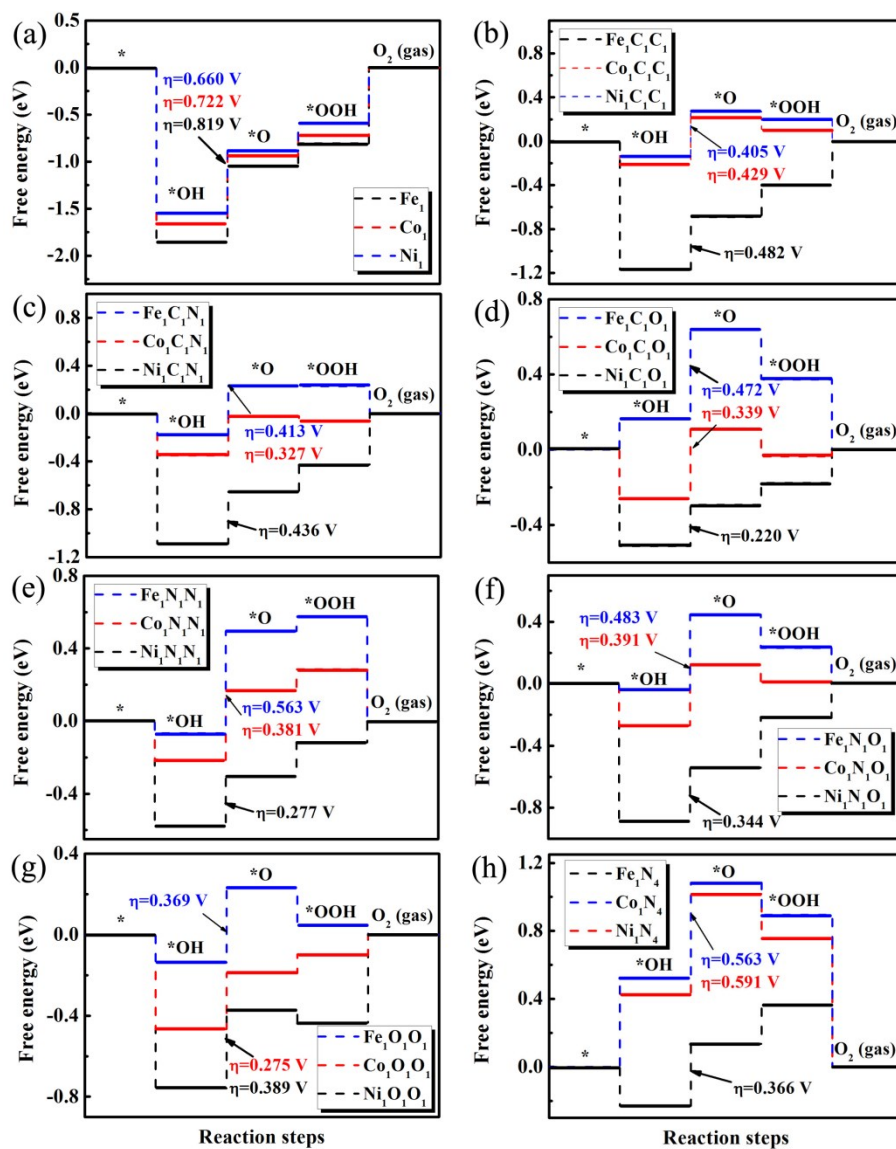

**Fig. S6** Gibbs free energy change curves of all systems with potential  $U = 1.23$  V vs RHE and with solvation effect.



**Table S1** Band length ( $d_{\text{TM1-NM}}$ ) and average bond length ( $d_{\text{ave}}$ ) of the TM<sub>1</sub>-NM bonds in all considered systems with unit of Å.

|                                               | $d_{\text{TM1-NM}}$                      | $d_{\text{ave}}$ |
|-----------------------------------------------|------------------------------------------|------------------|
| Co <sub>1</sub>                               | 1.963, 1.963, 2.579, 2.585, 2.759, 2.763 | 2.435            |
| Co <sub>1</sub> C <sub>1</sub> C <sub>1</sub> | 1.773, 1.788, 1.859, 1.876               | 1.824            |
| Co <sub>1</sub> C <sub>1</sub> N <sub>1</sub> | 1.828, 1.842, 1.873, 1.938               | 1.870            |
| Co <sub>1</sub> C <sub>1</sub> O <sub>1</sub> | 1.842, 1.892, 1.893, 1.934               | 1.890            |
| Co <sub>1</sub> N <sub>1</sub> N <sub>1</sub> | 1.831, 1.871, 1.885, 1.915               | 1.878            |
| Co <sub>1</sub> N <sub>1</sub> O <sub>1</sub> | 1.826, 1.837, 1.863, 1.967               | 1.873            |
| Co <sub>1</sub> O <sub>1</sub> O <sub>1</sub> | 1.855, 1.879, 1.911, 1.951               | 1.899            |
| Co <sub>1</sub> N <sub>4</sub>                | 1.892, 1.892, 1.892, 1.892               | 1.892            |
| Fe <sub>1</sub>                               | 1.978, 1.978, 2.514, 2.517, 2.764, 2.766 | 2.420            |
| Fe <sub>1</sub> C <sub>1</sub> C <sub>1</sub> | 1.786, 1.822, 1.896, 1.936               | 1.860            |
| Fe <sub>1</sub> C <sub>1</sub> N <sub>1</sub> | 1.831, 1.841, 1.897, 1.976               | 1.886            |
| Fe <sub>1</sub> C <sub>1</sub> O <sub>1</sub> | 1.848, 1.908, 1.913, 1.953               | 1.906            |
| Fe <sub>1</sub> N <sub>1</sub> N <sub>1</sub> | 1.811, 1.843, 1.921, 1.950               | 1.881            |
| Fe <sub>1</sub> N <sub>1</sub> O <sub>1</sub> | 1.805, 1.907, 1.908, 1.977               | 1.899            |
| Fe <sub>1</sub> O <sub>1</sub> O <sub>1</sub> | 1.864, 1.893, 1.915, 1.959               | 1.908            |
| Fe <sub>1</sub> N <sub>4</sub>                | 1.897, 1.897, 1.897, 1.897               | 1.897            |
| Ni <sub>1</sub>                               | 1.984, 1.985, 2.452, 2.634, 2.701, 2.753 | 2.418            |
| Ni <sub>1</sub> C <sub>1</sub> C <sub>1</sub> | 1.804, 1.810, 1.860, 1.876               | 1.838            |
| Ni <sub>1</sub> C <sub>1</sub> N <sub>1</sub> | 1.843, 1.861, 1.876, 1.940               | 1.880            |
| Ni <sub>1</sub> C <sub>1</sub> O <sub>1</sub> | 1.836, 1.861, 1.864, 1.924               | 1.871            |
| Ni <sub>1</sub> N <sub>1</sub> N <sub>1</sub> | 1.849, 1.857, 1.884, 1.885               | 1.869            |
| Ni <sub>1</sub> N <sub>1</sub> O <sub>1</sub> | 1.840, 1.867, 1.894, 1.916               | 1.879            |
| Ni <sub>1</sub> O <sub>1</sub> O <sub>1</sub> | 1.882, 1.915, 1.947, 1.953               | 1.924            |
| Ni <sub>1</sub> N <sub>4</sub>                | 1.893, 1.893, 1.893, 1.893               | 1.893            |

**Table S2** Adsorption free energies of  $\Delta G_{*OH}$ ,  $\Delta G_{*O}$  and  $\Delta G_{*OOH}$  and theoretical  $\eta^{OER}$  values of all considered systems with and without solvation effect, unit of eV.

|                                               | Without solvation effect |                 |                   |              | With the solvation effect |                 |                   |              |
|-----------------------------------------------|--------------------------|-----------------|-------------------|--------------|---------------------------|-----------------|-------------------|--------------|
|                                               | $\Delta G_{*OH}$         | $\Delta G_{*O}$ | $\Delta G_{*OOH}$ | $\eta^{OER}$ | $\Delta G_{*OH}$          | $\Delta G_{*O}$ | $\Delta G_{*OOH}$ | $\eta^{OER}$ |
| Co <sub>1</sub>                               | -0.431                   | 1.521           | 2.970             | 0.722        | -0.212                    | 1.777           | 3.228             | 0.759        |
| Co <sub>1</sub> C <sub>1</sub> C <sub>1</sub> | 1.017                    | 2.676           | 3.797             | 0.429        | 1.258                     | 2.927           | 4.045             | 0.439        |
| Co <sub>1</sub> C <sub>1</sub> N <sub>1</sub> | 0.881                    | 2.438           | 3.630             | 0.327        | 1.122                     | 2.697           | 3.878             | 0.345        |
| Co <sub>1</sub> C <sub>1</sub> O <sub>1</sub> | 0.972                    | 2.541           | 3.655             | 0.339        | 1.215                     | 2.814           | 3.901             | 0.369        |
| Co <sub>1</sub> N <sub>1</sub> N <sub>1</sub> | 1.017                    | 2.628           | 3.974             | 0.381        | 1.259                     | 2.882           | 4.226             | 0.393        |
| Co <sub>1</sub> N <sub>1</sub> O <sub>1</sub> | 0.962                    | 2.583           | 3.701             | 0.391        | 1.206                     | 2.835           | 3.956             | 0.399        |
| Co <sub>1</sub> O <sub>1</sub> O <sub>1</sub> | 0.764                    | 2.270           | 3.593             | 0.275        | 1.008                     | 2.524           | 3.848             | 0.286        |
| Co <sub>1</sub> N <sub>4</sub>                | 1.658                    | 3.479           | 4.442             | 0.591        | 1.901                     | 3.731           | 4.696             | 0.600        |
| Fe <sub>1</sub>                               | -0.634                   | 1.415           | 2.843             | 0.819        | -0.401                    | 1.639           | 3.098             | 0.810        |
| Fe <sub>1</sub> C <sub>1</sub> C <sub>1</sub> | 0.058                    | 1.770           | 3.289             | 0.482        | 0.302                     | 2.026           | 3.532             | 0.494        |
| Fe <sub>1</sub> C <sub>1</sub> N <sub>1</sub> | 0.141                    | 1.807           | 3.263             | 0.436        | 0.395                     | 2.051           | 3.517             | 0.426        |
| Fe <sub>1</sub> C <sub>1</sub> O <sub>1</sub> | 0.718                    | 2.167           | 3.513             | 0.220        | 0.971                     | 2.420           | 3.766             | 0.219        |
| Fe <sub>1</sub> N <sub>1</sub> N <sub>1</sub> | 0.649                    | 2.156           | 3.573             | 0.277        | 0.898                     | 2.411           | 3.826             | 0.283        |
| Fe <sub>1</sub> N <sub>1</sub> O <sub>1</sub> | 0.344                    | 1.918           | 3.469             | 0.344        | 0.589                     | 2.171           | 3.721             | 0.352        |
| Fe <sub>1</sub> O <sub>1</sub> O <sub>1</sub> | 0.471                    | 2.089           | 3.256             | 0.389        | 0.715                     | 2.342           | 3.505             | 0.397        |
| Fe <sub>1</sub> N <sub>4</sub>                | 0.999                    | 2.595           | 4.057             | 0.366        | 1.242                     | 2.858           | 4.306             | 0.386        |
| Ni <sub>1</sub>                               | -0.320                   | 1.590           | 3.102             | 0.680        | -0.098                    | 1.838           | 3.326             | 0.706        |
| Ni <sub>1</sub> C <sub>1</sub> C <sub>1</sub> | 1.095                    | 2.730           | 3.882             | 0.405        | 1.352                     | 2.989           | 4.139             | 0.407        |
| Ni <sub>1</sub> C <sub>1</sub> N <sub>1</sub> | 1.050                    | 2.692           | 3.919             | 0.413        | 1.399                     | 3.097           | 4.172             | 0.368        |
| Ni <sub>1</sub> C <sub>1</sub> O <sub>1</sub> | 1.396                    | 3.098           | 4.064             | 0.472        | 1.650                     | 3.353           | 4.319             | 0.468        |
| Ni <sub>1</sub> N <sub>1</sub> N <sub>1</sub> | 1.163                    | 2.956           | 4.264             | 0.563        | 1.415                     | 3.212           | 4.518             | 0.567        |
| Ni <sub>1</sub> N <sub>1</sub> O <sub>1</sub> | 1.195                    | 2.908           | 3.922             | 0.483        | 1.449                     | 3.164           | 4.179             | 0.485        |
| Ni <sub>1</sub> O <sub>1</sub> O <sub>1</sub> | 1.093                    | 2.692           | 3.735             | 0.369        | 1.347                     | 2.951           | 3.989             | 0.374        |
| Ni <sub>1</sub> N <sub>4</sub>                | 1.751                    | 3.544           | 4.585             | 0.563        | 2.003                     | 3.801           | 4.838             | 0.568        |
